# Supplementary material for: Air Pollution by Hydrothermal Volcanism and Human Pulmonary Function
Source: Hindawi journal article supplement (doi:10.1155/2015/326794), 2015-01-01
Supplement: f1 [file 326794.f1.pdf]

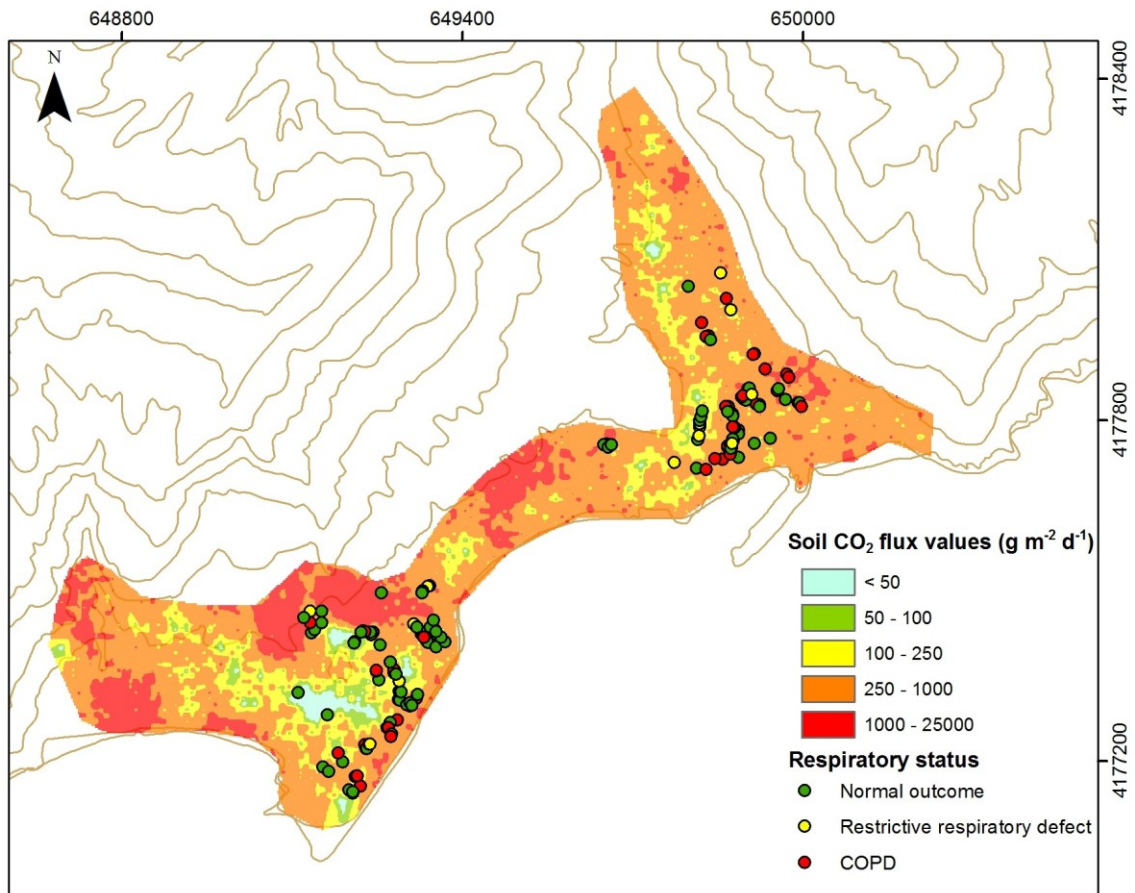

Supplementary material 1. Volcanogenic soil CO<sub>2</sub> diffuse degassing map from Ribeira Quente village (adapted from Viveiros et al. 2010). The dots represent the 150 studied individuals and their respiratory test outcomes (normal outcome - green; restrictive respiratory defect- yellow; COPD -red).
